# Supplementary material for: Controllable preparation of 2D carbon paper modified with flower-like WS2 for efficient microwave absorption
Source: Royal Society of Chemistry journal article supplement (doi:10.1039/d2dt03137j), 2023-01-01
Supplement: d2dt03137j1.pdf [file d2dt03137j1.pdf]

## Supporting information for

### Controllable preparation of 2D carbon paper modified with flower-like WS<sub>2</sub> for efficient microwave absorption

Hao Chen,<sup>a,b</sup> Zhengjian Xu,<sup>b</sup> Yuming Zhou,<sup>\*b</sup> Meiyun Zhang,<sup>a</sup> Shuangjiang Feng,<sup>b</sup>  
Xiaohai Bu<sup>c</sup> Zewu Zhang<sup>c</sup> and Man He<sup>\*b</sup>

<sup>a</sup> Key Laboratory of Auxiliary Chemistry and Technology for Chemical Industry, Ministry of Education, Shaanxi University of Science & Technology, Xi'an 710021, China

<sup>b</sup> Jiangsu Optoelectronic Functional Materials and Engineering Laboratory, School of Chemistry and Chemical Engineering, Southeast University, Nanjing 211189, China

<sup>c</sup> School of Materials Science and Engineering, Nanjing Institute of Technology, Nanjing 211167, China

#### Corresponding Authors

\*E-mail: heman@seu.edu.cn (Man He)

\*E-mail: ymzhou@seu.edu.cn (Yuming Zhou)

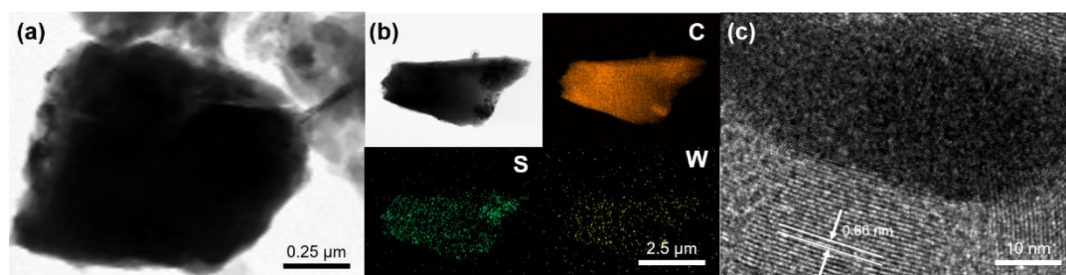

**Figure S1.** (a) TEM, (b) Elemental mapping images and (c) HRTEM images of CW-2.
